# Supplementary material for: Bat-Fruit Interactions Are More Specialized in Shaded-Coffee Plantations than in Tropical Mountain Cloud Forest Fragments
Source: PubMed Central journal article supplement (PMC4436294; doi:10.1371/journal.pone.0126084), 2015-05-18
Supplement: pone.0126084.s001.pdf [file pone.0126084.s001.pdf]

S1 Appendix. Bat-fruit interaction matrices by site and season. Letter B refers to TMCF, while letter C refers to SCP.

| B1 Wet                            | <i>Artibeus jamaicensis</i> | <i>Artibeus tolteca</i> | <i>Sturnira parvidens</i> | <i>Sturnira hondurensis</i> |
|-----------------------------------|-----------------------------|-------------------------|---------------------------|-----------------------------|
| <i>Aff. Cecropia</i>              | 1                           | 0                       | 0                         | 0                           |
| <i>Hedyosmum mexicanum</i>        | 0                           | 0                       | 0                         | 7                           |
| <i>Piper hispidum</i>             | 0                           | 0                       | 0                         | 23                          |
| <i>Piper lapathifolium</i>        | 0                           | 0                       | 0                         | 8                           |
| <i>Piper</i> spp 1                | 0                           | 0                       | 0                         | 2                           |
| <i>Solanum acerifolium</i>        | 0                           | 0                       | 0                         | 1                           |
| <i>Solanum aphyodendron</i>       | 0                           | 1                       | 0                         | 10                          |
| <i>Solanum schlechtendalianum</i> | 0                           | 0                       | 1                         | 7                           |

| B1 Nortes                  | <i>Carollia sowelli</i> | <i>Sturnira hondurensis</i> |
|----------------------------|-------------------------|-----------------------------|
| <i>Hedyosmum mexicanum</i> | 1                       | 19                          |
| <i>Piper auritum</i>       | 1                       | 0                           |

| B1 Dry                            | <i>Carollia sowelli</i> | <i>Sturnira parvidens</i> | <i>Sturnira hondurensis</i> |
|-----------------------------------|-------------------------|---------------------------|-----------------------------|
| <i>Hedyosmum mexicanum</i>        | 0                       | 2                         | 2                           |
| <i>Piper hispidum</i>             | 0                       | 1                         | 0                           |
| <i>Piper lapathifolium</i>        | 2                       | 7                         | 8                           |
| <i>Piper</i> spp 4                | 0                       | 0                         | 1                           |
| Solanaceae spp 4                  | 0                       | 0                         | 6                           |
| <i>Solanum aphyodendron</i>       | 0                       | 2                         | 1                           |
| <i>Solanum schlechtendalianum</i> | 0                       | 0                         | 3                           |

| B2 Wet                            | <i>Artibeus jamaicensis</i> | <i>Carollia sowelli</i> | <i>Sturnira hondurensis</i> |
|-----------------------------------|-----------------------------|-------------------------|-----------------------------|
| <i>Hedyosmum mexicanum</i>        | 0                           | 0                       | 2                           |
| <i>Piper auritum</i>              | 0                           | 0                       | 2                           |
| <i>Piper hispidum</i>             | 1                           | 5                       | 11                          |
| <i>Piper lapathifolium</i>        | 0                           | 0                       | 7                           |
| Solanaceae spp 1                  | 0                           | 0                       | 1                           |
| <i>Solanum aphyodendron</i>       | 0                           | 1                       | 6                           |
| <i>Solanum schlechtendalianum</i> | 0                           | 0                       | 3                           |

| B2 Nortes                         | <i>Carollia sowelli</i> | <i>Dermanura tolteca</i> | <i>Sturnira hondurensis</i> |
|-----------------------------------|-------------------------|--------------------------|-----------------------------|
| <i>Hedyosmum mexicanum</i>        | 0                       | 0                        | 9                           |
| <i>Miconia glaberrima</i>         | 0                       | 0                        | 1                           |
| <i>Piper auritum</i>              | 2                       | 0                        | 2                           |
| <i>Solanum aphyodendron</i>       | 0                       | 1                        | 2                           |
| <i>Solanum schlechtendalianum</i> | 0                       | 0                        | 1                           |

| B2 Dry                            | <i>Carollia sowelli</i> | <i>Sturnira parvidens</i> | <i>Sturnira hondurensis</i> |
|-----------------------------------|-------------------------|---------------------------|-----------------------------|
| <i>Hedyosmum mexicanum</i>        | 1                       | 3                         | 4                           |
| Spp 1                             | 0                       | 2                         | 1                           |
| <i>Piper hispidum</i>             | 1                       | 0                         | 0                           |
| <i>Piper lapathifolium</i>        | 3                       | 6                         | 9                           |
| Solanaceae spp 3                  | 0                       | 1                         | 3                           |
| <i>Solanum aphyodendron</i>       | 2                       | 6                         | 1                           |
| <i>Solanum schlechtendalianum</i> | 0                       | 1                         | 0                           |

| B3 Wet                            | <i>Carollia sowelli</i> | <i>Sturnira hondurensis</i> |
|-----------------------------------|-------------------------|-----------------------------|
| <i>Hedyosmum mexicanum</i>        | 0                       | 1                           |
| <i>Piper hispidum</i>             | 2                       | 8                           |
| <i>Piper lapathifolium</i>        | 0                       | 4                           |
| <i>Piper</i> spp 3                | 0                       | 1                           |
| <i>Solanum aphyodendron</i>       | 0                       | 2                           |
| <i>Solanum schlechtendalianum</i> | 0                       | 8                           |

| B3 Nortes                         | <i>Artibeus jamaicensis</i> | <i>Carollia sowelli</i> | <i>Sturnira parvidens</i> | <i>Sturnira hondurensis</i> |
|-----------------------------------|-----------------------------|-------------------------|---------------------------|-----------------------------|
| <i>Hedyosmum mexicanum</i>        | 0                           | 0                       | 0                         | 2                           |
| <i>Lycianthes geminifolia</i>     | 0                           | 0                       | 0                         | 1                           |
| Spp 5                             | 1                           | 0                       | 0                         | 0                           |
| <i>Piper auritum</i>              | 0                           | 0                       | 0                         | 3                           |
| Solanaceae spp 2                  | 0                           | 1                       | 0                         | 0                           |
| <i>Solanum acerifolium</i>        | 0                           | 0                       | 0                         | 1                           |
| <i>Solanum diflorum</i>           | 0                           | 1                       | 0                         | 1                           |
| <i>Solanum schlechtendalianum</i> | 0                           | 1                       | 2                         | 5                           |

| B3 Dry                        | <i>Carollia sowelli</i> | <i>Sturnira parvidens</i> | <i>Sturnira hondurensis</i> |
|-------------------------------|-------------------------|---------------------------|-----------------------------|
| <i>Lycianthes geminifolia</i> | 0                       | 1                         | 0                           |
| <i>Piper hispidum</i>         | 0                       | 0                         | 1                           |
| <i>Piper lapathifolium</i>    | 1                       | 3                         | 4                           |
| <i>Piper</i> spp 4            | 0                       | 0                         | 1                           |
| Solanaceae spp 4              | 0                       | 0                         | 1                           |

|                                   | B4 Wet                      |                         |                           |                             |
|-----------------------------------|-----------------------------|-------------------------|---------------------------|-----------------------------|
|                                   | <i>Artibeus jamaicensis</i> | <i>Carollia sowelli</i> | <i>Sturnira parvidens</i> | <i>Sturnira hondurensis</i> |
| <i>Solanum aphyodendron</i>       | 1                           | 1                       | 2                         |                             |
| <i>Solanum schlechtendalianum</i> | 0                           | 1                       | 1                         |                             |
| Spp 4                             | 1                           | 0                       | 0                         | 0                           |
| <i>Piper auritum</i>              | 0                           | 0                       | 0                         | 1                           |
| <i>Piper hispidum</i>             | 0                           | 2                       | 0                         | 5                           |
| <i>Piper lapathifolium</i>        | 0                           | 1                       | 0                         | 4                           |
| Solanaceae spp1                   | 0                           | 0                       | 0                         | 2                           |
| <i>Solanum aphyodendron</i>       | 0                           | 0                       | 0                         | 5                           |
| <i>Solanum schlechtendalianum</i> | 1                           | 0                       | 1                         | 3                           |

|                                   | B4 Nortes                   |                         |                          |                                 |                           |                             |
|-----------------------------------|-----------------------------|-------------------------|--------------------------|---------------------------------|---------------------------|-----------------------------|
|                                   | <i>Artibeus jamaicensis</i> | <i>Carollia sowelli</i> | <i>Dermanura tolteca</i> | <i>Glossophaga commissarisi</i> | <i>Sturnira parvidens</i> | <i>Sturnira hondurensis</i> |
| <i>Hedyosmum mexicanum</i>        | 0                           | 0                       | 0                        | 0                               | 0                         | 6                           |
| <i>Lycianthes geminifolia</i>     | 0                           | 0                       | 1                        | 0                               | 1                         | 1                           |
| <i>Piper auritum</i>              | 0                           | 3                       | 0                        | 0                               | 0                         | 3                           |
| <i>Solanum aphyodendron</i>       | 0                           | 0                       | 2                        | 0                               | 0                         | 1                           |
| <i>Solanum schlechtendalianum</i> | 0                           | 1                       | 0                        | 0                               | 0                         | 4                           |
| <i>Trema micrantha</i>            | 3                           | 0                       | 4                        | 1                               | 0                         | 4                           |

|                               | B4 Dry                      |                         |                          |                           |                             |
|-------------------------------|-----------------------------|-------------------------|--------------------------|---------------------------|-----------------------------|
|                               | <i>Artibeus jamaicensis</i> | <i>Carollia sowelli</i> | <i>Dermanura tolteca</i> | <i>Sturnira parvidens</i> | <i>Sturnira hondurensis</i> |
| <i>Hedyosmum mexicanum</i>    | 0                           | 0                       | 0                        | 0                         | 1                           |
| <i>Lycianthes geminifolia</i> | 0                           | 0                       | 0                        | 1                         | 0                           |
| Spp 1                         | 0                           | 1                       | 0                        | 0                         | 1                           |
| <i>Piper hispidum</i>         | 0                           | 1                       | 0                        | 0                         | 0                           |

|                             |                         |                             |   |   |    |
|-----------------------------|-------------------------|-----------------------------|---|---|----|
| <i>Piper lapathifolium</i>  | 0                       | 2                           | 0 | 6 | 10 |
| <i>Solanum aphyodendron</i> | 1                       | 2                           | 1 | 1 | 1  |
| C1 Wet                      | <i>Carollia sowelli</i> | <i>Glossophaga soricina</i> |   |   |    |
| <i>Miconia mexicana</i>     | 0                       | 1                           |   |   |    |
| <i>Piper spp 2</i>          | 1                       | 0                           |   |   |    |

|                                   |                             |                         |                           |                             |
|-----------------------------------|-----------------------------|-------------------------|---------------------------|-----------------------------|
| C1 Nortes                         | <i>Artibeus jamaicensis</i> | <i>Carollia sowelli</i> | <i>Sturnira parvidens</i> | <i>Sturnira hondurensis</i> |
| <i>Lycianthes geminifolia</i>     | 0                           | 1                       | 0                         | 1                           |
| <i>Piper auritum</i>              | 1                           | 1                       | 0                         | 2                           |
| <i>Solanum acerifolium</i>        | 0                           | 0                       | 0                         | 1                           |
| <i>Solanum schlechtendalianum</i> | 0                           | 0                       | 0                         | 2                           |
| <i>Vismia mexicana</i>            | 0                           | 2                       | 1                         | 1                           |

|                               |                             |                         |                           |                             |
|-------------------------------|-----------------------------|-------------------------|---------------------------|-----------------------------|
| C1 Dry                        | <i>Artibeus jamaicensis</i> | <i>Carollia sowelli</i> | <i>Sturnira parvidens</i> | <i>Sturnira hondurensis</i> |
| <i>Ficus (Urostigma)</i>      | 1                           | 0                       | 0                         | 0                           |
| <i>Lycianthes geminifolia</i> | 1                           | 0                       | 1                         | 0                           |
| Spp 2                         | 1                           | 0                       | 0                         | 0                           |
| <i>Piper lapathifolium</i>    | 0                           | 1                       | 0                         | 2                           |
| <i>Solanum aphyodendron</i>   | 0                           | 1                       | 0                         | 3                           |

| C2 Wet                      | <i>Artibeus jamaicensis</i> | <i>Sturnira hondurensis</i> |
|-----------------------------|-----------------------------|-----------------------------|
| <i>Aff. Cecropia</i>        | 1                           | 0                           |
| <i>Piper auritum</i>        | 0                           | 1                           |
| <i>Piper hispidum</i>       | 0                           | 1                           |
| <i>Solanum aphyodendron</i> | 0                           | 2                           |
| <i>Trema micrantha</i>      | 1                           | 0                           |

| C2 Nortes                         | <i>Artibeus jamaicensis</i> | <i>Sturnira hondurensis</i> |
|-----------------------------------|-----------------------------|-----------------------------|
| <i>Lycianthes geminifolia</i>     | 1                           | 0                           |
| <i>Piper auritum</i>              | 0                           | 1                           |
| Solanaceae spp 2                  | 0                           | 1                           |
| <i>Solanum acerifolium</i>        | 0                           | 1                           |
| <i>Solanum aphyodendron</i>       | 0                           | 1                           |
| <i>Solanum schlechtendalianum</i> | 0                           | 2                           |
| <i>Vismia mexicana</i>            | 0                           | 3                           |

| C2 Dry                        | <i>Artibeus jamaicensis</i> | <i>Carollia sowelli</i> | <i>Sturnira parvidens</i> | <i>Sturnira hondurensis</i> |
|-------------------------------|-----------------------------|-------------------------|---------------------------|-----------------------------|
| <i>Lycianthes geminifolia</i> | 2                           | 0                       | 1                         | 2                           |
| <i>Piper hispidum</i>         | 0                           | 0                       | 1                         | 0                           |
| <i>Piper lapathifolium</i>    | 0                           | 0                       | 3                         | 0                           |
| <i>Solanum aphyodendron</i>   | 0                           | 2                       | 2                         | 3                           |

| C3 Wet                        | <i>Sturnira hondurensis</i> |
|-------------------------------|-----------------------------|
| <i>Lycianthes geminifolia</i> | 1                           |
| <i>Piper auritum</i>          | 1                           |
| <i>Piper hispidum</i>         | 1                           |

| C3 Nortes                     | <i>Artibeus jamaicensis</i> | <i>Carollia sowelli</i> | <i>Dermanura tolteca</i> |
|-------------------------------|-----------------------------|-------------------------|--------------------------|
| <i>Eriobotrya japonica</i>    | 0                           | 0                       | 1                        |
| <i>Lycianthes geminifolia</i> | 1                           | 0                       | 0                        |
| <i>Vismia mexicana</i>        | 0                           | 1                       | 0                        |

| C3 Dry                     | <i>Sturnira parvidens</i> |
|----------------------------|---------------------------|
| <i>Piper lapathifolium</i> | 1                         |

| C4 Wet               | <i>Artibeus jamaicensis</i> | <i>Glossophaga soricina</i> |
|----------------------|-----------------------------|-----------------------------|
| Aff. <i>Cecropia</i> | 1                           | 0                           |
| <i>Piper</i> spp 5   | 0                           | 1                           |

| C4 Nortes                         | <i>Artibeus lituratus</i> | <i>Carollia sowelli</i> | <i>Dermanura tolteca</i> | <i>Sturnira hondurensis</i> |
|-----------------------------------|---------------------------|-------------------------|--------------------------|-----------------------------|
| <i>Hedyosmum mexicanum</i>        | 0                         | 0                       | 0                        | 1                           |
| Spp 3                             | 1                         | 0                       | 0                        | 0                           |
| <i>Piper auritum</i>              | 0                         | 0                       | 0                        | 5                           |
| <i>Solanum acerifolium</i>        | 0                         | 0                       | 0                        | 2                           |
| <i>Solanum aphyodendron</i>       | 0                         | 0                       | 0                        | 3                           |
| <i>Solanum schlechtendalianum</i> | 0                         | 1                       | 0                        | 0                           |
| <i>Vismia mexicana</i>            | 0                         | 4                       | 1                        | 7                           |

| C4 Dry                      | <i>Carollia sowelli</i> | <i>Dermanura tolteca</i> |
|-----------------------------|-------------------------|--------------------------|
| <i>Solanum aphyodendron</i> | 1                       | 1                        |
