# Supplementary material for: Bat-Fruit Interactions Are More Specialized in Shaded-Coffee Plantations than in Tropical Mountain Cloud Forest Fragments
Source: PubMed Central journal article supplement (PMC4436294; doi:10.1371/journal.pone.0126084), 2015-05-18
Supplement: pone.0126084.s002.pdf [file pone.0126084.s002.pdf]

S2 Table. Captured bat species in tropical mountain cloud forest fragments (TMCF) and shade coffee plantations (SCP). Guild bat classification is based on Rojas et al. 2012.

| <b>Species</b>                  | <b>Guild</b> | <b>TMCF</b> | <b>SCP</b> | <b>Total</b> |
|---------------------------------|--------------|-------------|------------|--------------|
| <b>Stenodermatinae</b>          |              |             |            |              |
| <i>Artibeus jamaicensis</i>     | Frugivore    | 41          | 48         | 89           |
| <i>Artibeus lituratus</i>       | Frugivore    | 2           | 11         | 13           |
| <i>Dermanura tolteca</i>        | Frugivore    | 23          | 9          | 32           |
| <i>Centurio senex</i>           | Frugivore    | 0           | 3          | 3            |
| <i>Sturnira hodurensis</i>      | Frugivore    | 329         | 95         | 424          |
| <i>Sturnira parvidens</i>       | Frugivore    | 63          | 12         | 75           |
| <b>Carollinae</b>               |              |             |            |              |
| <i>Carollia sowelli</i>         | Frugivore    | 47          | 17         | 64           |
| <b>Glossophaginae</b>           |              |             |            |              |
| <i>Anoura geoffroyi</i>         | Nectarivore  | 3           | 13         | 16           |
| <i>Glossophaga soricina</i>     | Nectarivore  | 0           | 6          | 6            |
| <i>Glossophaga commissarisi</i> | Nectarivore  | 1           | 5          | 6            |
| <b>Desmodontinae</b>            |              |             |            |              |
| <i>Desmodus rotundus</i>        | Saguinivore  | 13          | 0          | 13           |
| <b>Verpertelionidae</b>         |              |             |            |              |
| <i>Myotis keaysi</i>            | Insectivore  | 6           | 2          | 8            |
| <b>Mormoopidae</b>              |              |             |            |              |
| <i>Mormoops megalophylla</i>    | Insectivore  | 15          | 2          | 17           |
| <i>Pteronotus davyi</i>         | Insectivore  | 0           | 1          | 1            |
| <i>Pteronotus parnelli</i>      | Insectivore  | 1           | 0          | 1            |
| <b>Total</b>                    |              | 544         | 224        | 768          |
| <b>Richness (S)</b>             |              | 12          | 14         | 15           |

Rojas D, Vale Á, Ferrero V, Navarro L (2012) The role of frugivory in the diversification of bats in the Neotropics. *Journal of Biogeography* 39: 1948–1960. doi:10.1111/j.1365-2699.2012.02709.x.
